# Supplementary material for: A bi-metallic MOF catalyst via sensitive detection & adsorption of Fe3+ ions for size-selective reaction prompting
Source: Royal Society of Chemistry journal article supplement (doi:10.1039/c8dt01145a), 2018-01-01
Supplement: c8dt01145a1.pdf [file c8dt01145a1.pdf]

## Supporting Information

### **A Bi-metallic MOF Catalyst *via* Sensitive Detection & Adsorption of Fe<sup>3+</sup> Ions for Size-selective Reaction Prompting**

*Yang Li,<sup>a</sup> Ziling Chang,<sup>a</sup> Fangmin Huang,<sup>a</sup> Pengyan Wu,<sup>a,\*</sup> Huacong Chu<sup>a</sup> and Jian Wang<sup>a,\*</sup>*

<sup>a</sup>School of Chemistry and Materials Science & Jiangsu Key Laboratory of Green Synthetic Chemistry for Functional Materials, Jiangsu Normal University, Xuzhou, 221116, P. R. China.

E-mail: [wpyan@jsnu.edu.cn](mailto:wpyan@jsnu.edu.cn) (P.Y. Wu); [wjian@jsnu.edu.cn](mailto:wjian@jsnu.edu.cn) (J. Wang)

## Additional experimental details.

**Reagents and chemicals:** All reagents and solvents were of AR grade and used without further purification unless otherwise noted. 5,5'-methylenebisophthalic acid was synthesized according to the literature methods. (*Eur. J. Org. Chem.*, **2007**, *20*, 3271-3276)  $\text{Cd}(\text{ClO}_4)_2 \cdot 6\text{H}_2\text{O}$  was purchased from Alfa Aesar,  $\text{Fe}(\text{NO}_3)_3 \cdot 9\text{H}_2\text{O}$  and the other metal salts were provided from Shanghai Fourth Chemical Reagent Company (China). All of the aromatic aldehydes (Benzaldehyde, 4-nitrobenzaldehyde, 4-methoxybenzaldehyde, 1-naphthaldehyde and 3,5-di-tert-butylbenzaldehyde) were purchased from Beijing Innochem Science & Technology Co., Ltd.. Stock solution ( $2 \times 10^{-2}$  M) of the aqueous nitrate salts of  $\text{Li}^+$ ,  $\text{Na}^+$ ,  $\text{K}^+$ ,  $\text{Mg}^{2+}$ ,  $\text{Ca}^{2+}$ ,  $\text{Sr}^{2+}$ ,  $\text{Ba}^{2+}$ ,  $\text{Co}^{2+}$ ,  $\text{Ni}^{2+}$ ,  $\text{Cu}^{2+}$ ,  $\text{Mn}^{2+}$ ,  $\text{Zn}^{2+}$ ,  $\text{Cd}^{2+}$ ,  $\text{Fe}^{2+}$ ,  $\text{Ag}^+$ ,  $\text{Pb}^{2+}$ ,  $\text{Al}^{3+}$ ,  $\text{Cr}^{3+}$ ,  $\text{Fe}^{3+}$  and  $\text{Hg}^{2+}$  were prepared for further experiments.

**Instruments and spectroscopic measurements:** The elemental analyses of C, H and N were performed on a Vario EL III elemental analyzer.  $^1\text{H}$  NMR spectra were measured on a Bruker-400 spectrometer with  $\text{Me}_4\text{Si}$  as an internal standard. X-Ray powder diffraction (XRD) patterns of the Cd-MDIP was recorded on a Rigaku D/max-2400 X-ray powder diffractometer (Japan) using  $\text{Cu-K}\alpha$  ( $\lambda = 1.5405 \text{ \AA}$ ) radiation. FT-IR spectra were recorded as KBr pellets on JASCO FT/IR-430. Thermogravimetric analysis (TGA) was carried out at a ramp rate of  $5 \text{ }^\circ\text{C}/\text{min}$  in a nitrogen flow with a Mettler-Toledo TGA/SDTA851 instrument. Fluorescence spectra of the solution were obtained using the F-4600 spectrometer (Hitachi). Both excitation and emission slit widths were 5 nm. Fluorescence measurements were carried out in a 1 cm quartzcuvette with stirring the suspension of Cd-MDIP. The adsorption abilities of Cd-MDIP for  $\text{Fe}^{3+}$  in water was measured by Inductively Coupled Plasma Spectrometer (Perkin Elmer).

**Table S1** Selective bond distance (Å) and angle (°) in Cd-MDIP.

---

|                    |            |                    |           |
|--------------------|------------|--------------------|-----------|
| Cd(1)–O(1W)        | 2.271(7)   | Cd(1)–O(2B)        | 2.323(4)  |
| Cd(1)–O(2)         | 2.323(4)   | Cd(1)–O(1)         | 2.372(3)  |
| Cd(1)–O(1B)        | 2.372(3)   | Cd(1)–O(2W)        | 2.452(6)  |
| Cd(1)–O(2WA)       | 2.454(4)   |                    |           |
| O(1W)–Cd(1)–O(2B)  | 88.64(11)  | O(1W)–Cd(1)–O(2)   | 88.64(11) |
| O(2B)–Cd(1)–O(2)   | 158.03(17) | O(1W)–Cd(1)–O(1)   | 96.06(18) |
| O(2B)–Cd(1)–O(1)   | 146.66(11) | O(2)–Cd(1)–O(1)    | 55.31(11) |
| O(1W)–Cd(1)–O(1B)  | 96.07(18)  | O(2B)–Cd(1)–O(1B)  | 55.31(11) |
| O(2)–Cd(1)–O(1B)   | 146.66(11) | O(1)–Cd(1)–O(1B)   | 91.35(16) |
| O(1W)–Cd(1)–O(2W)  | 173.9(2)   | O(2B)–Cd(1)–O(2W)  | 90.19(10) |
| O(2)–Cd(1)–O(2W)   | 90.19(10)  | O(1)–Cd(1)–O(2W)   | 88.21(13) |
| O(1B)–Cd(1)–O(2W)  | 88.20(13)  | O(1W)–Cd(1)–O(2WA) | 96.0(2)   |
| O(2B)–Cd(1)–O(2WA) | 79.30(8)   | O(2)–Cd(1)–O(2WA)  | 79.30(8)  |
| O(1)–Cd(1)–O(2WA)  | 132.53(8)  | O(1B)–Cd(1)–O(2WA) | 132.53(8) |
| O(2W)–Cd(1)–O(2WB) | 77.90(18)  |                    |           |

Symmetry code A:  $x, -y, 1-z$ ; B:  $-x, y, z$ .

---

**Figure S1.** The fluorescence spectra of Cd-MDIP in water solution upon the addition of 0.55 mM of various metal ions.

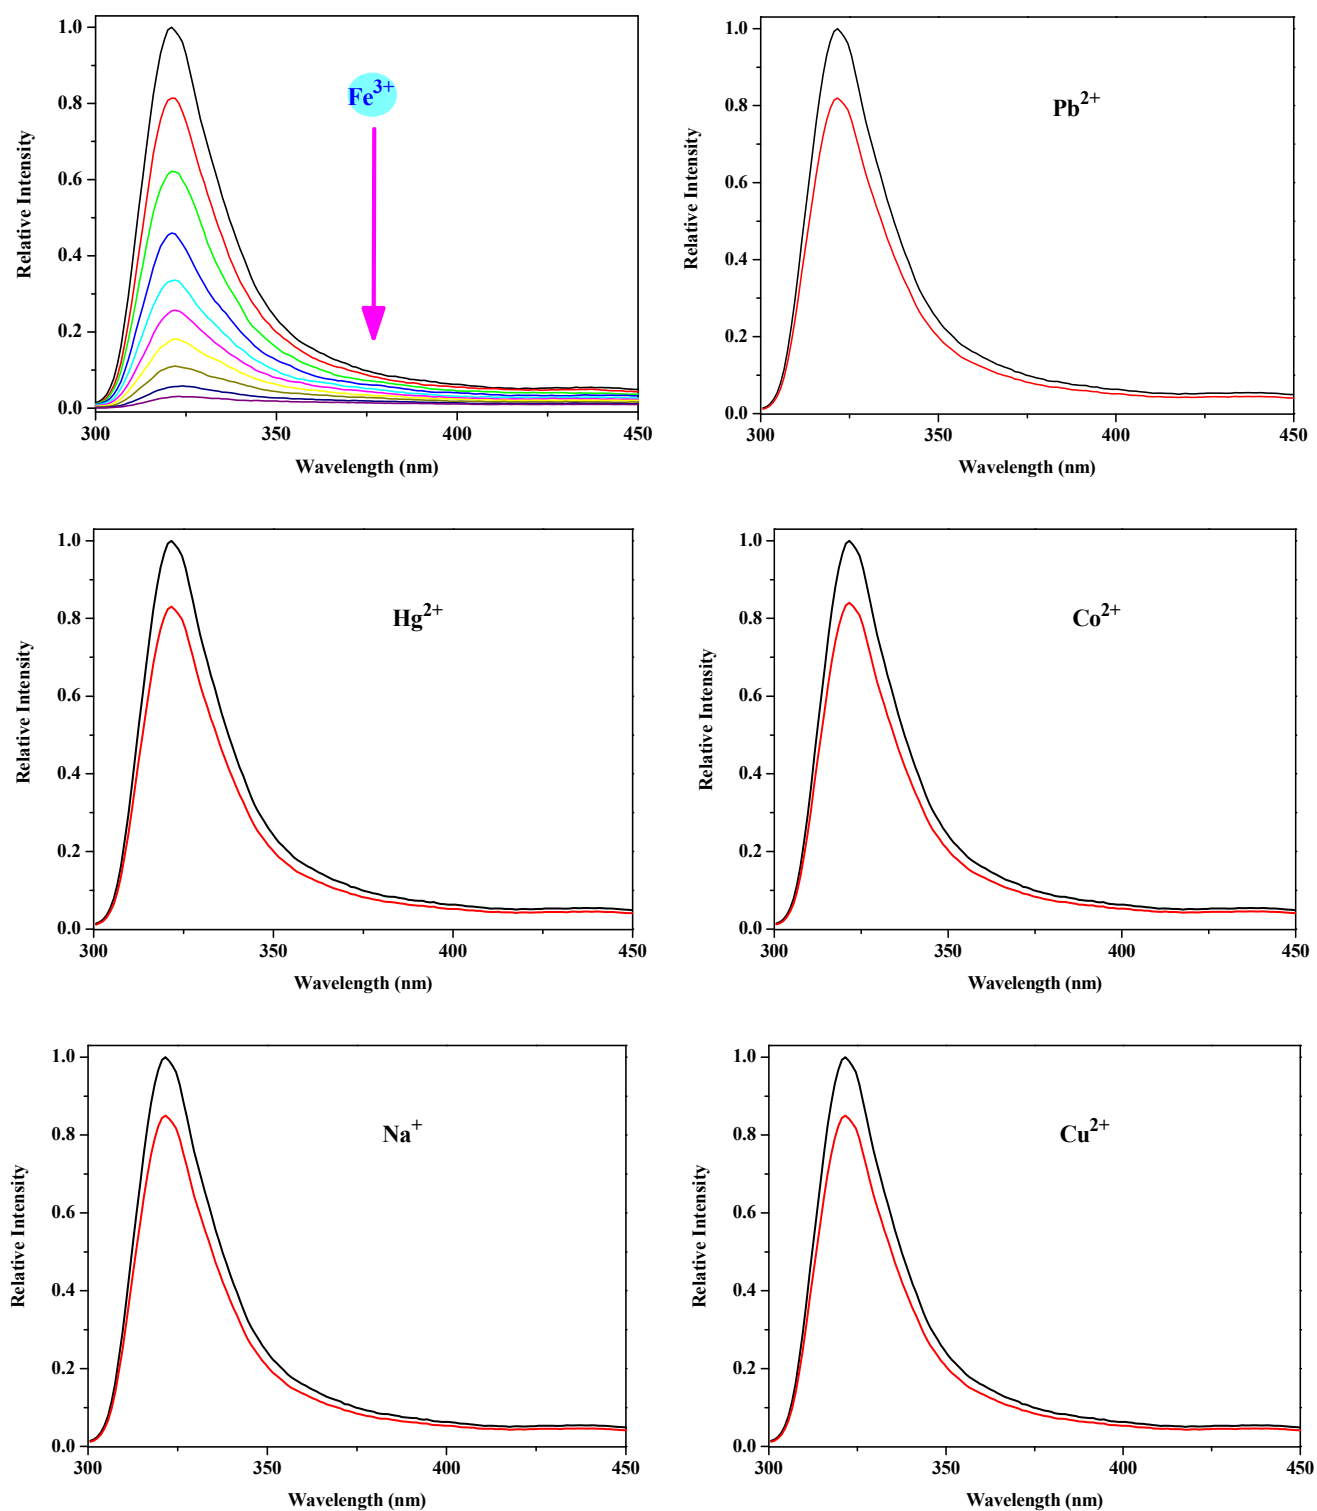

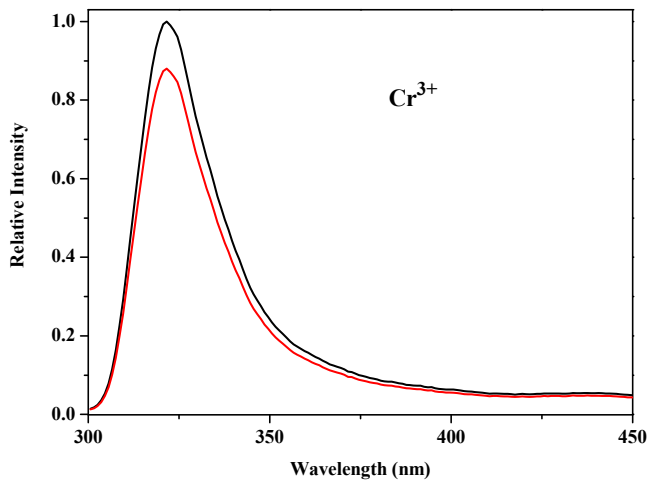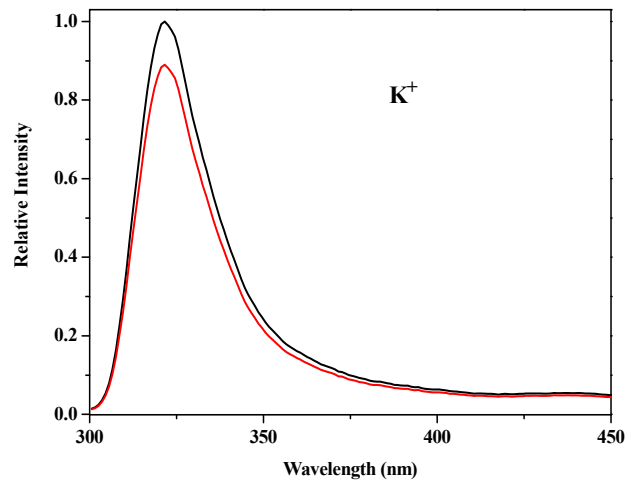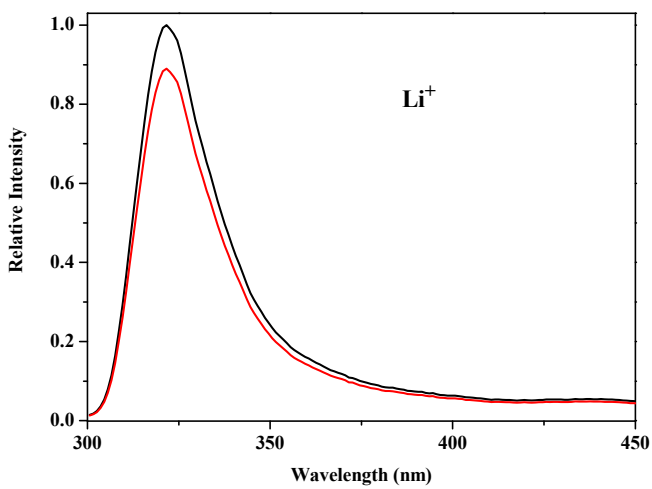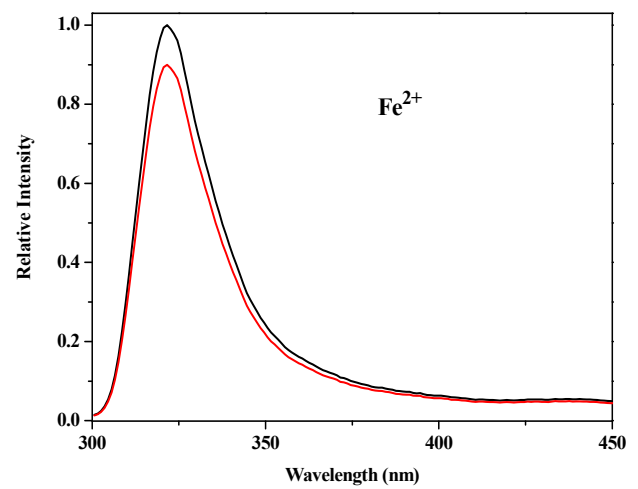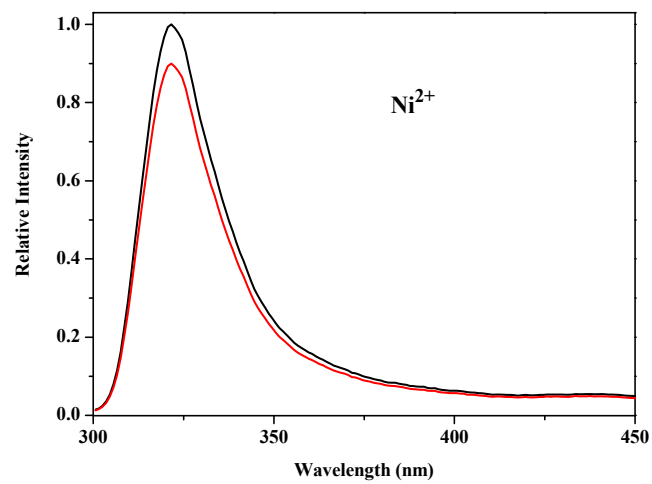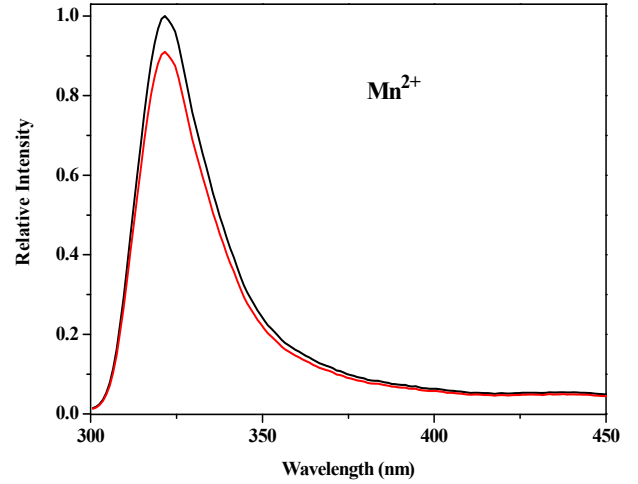

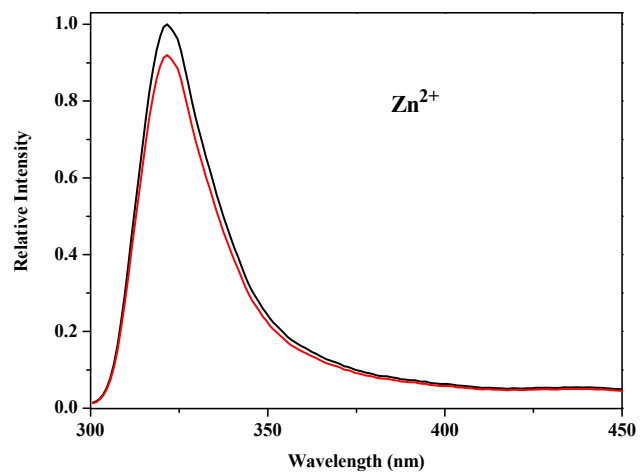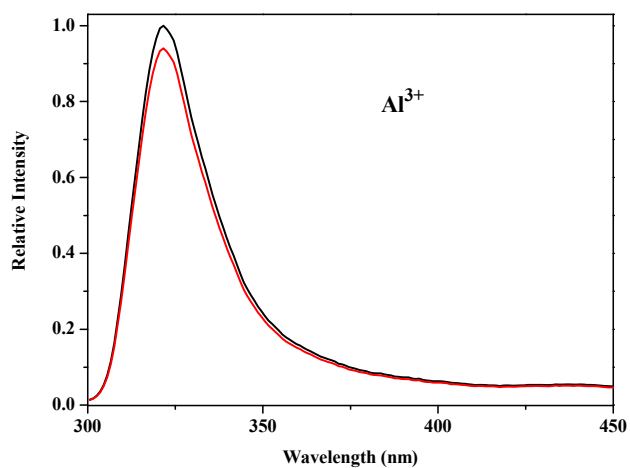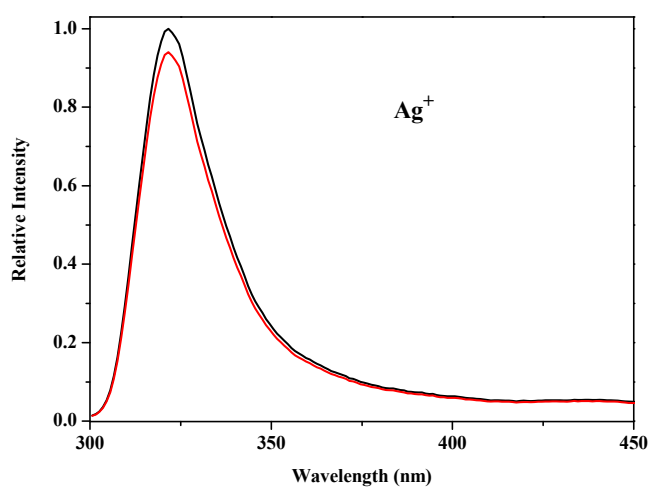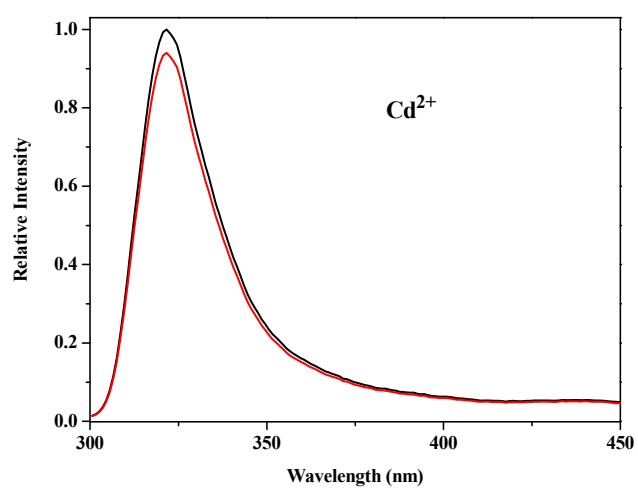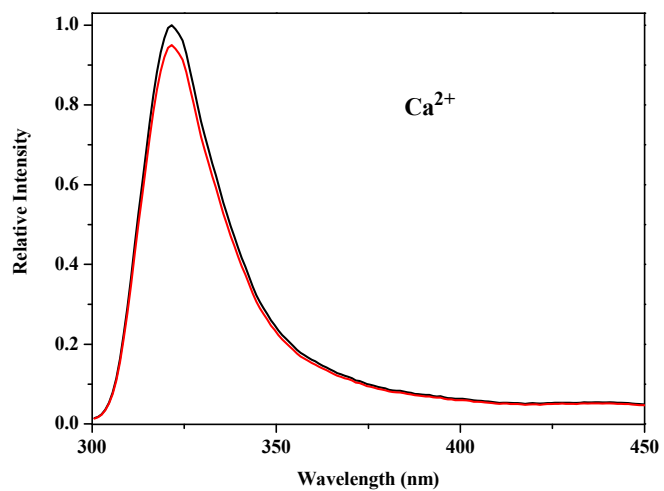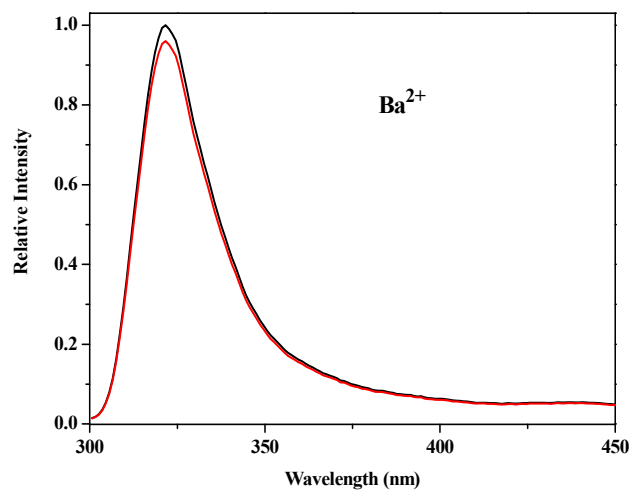

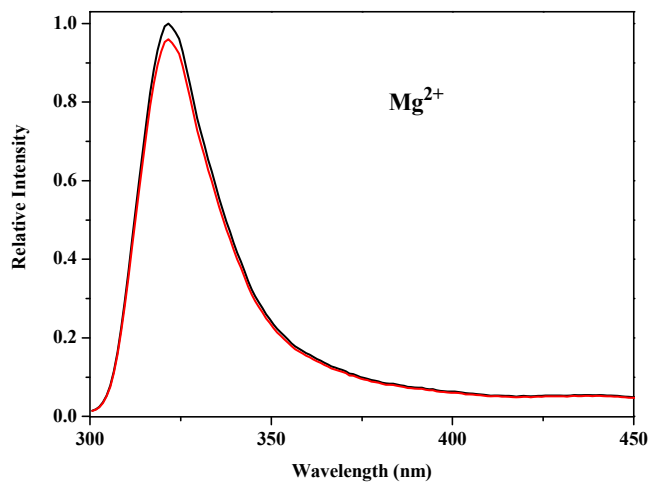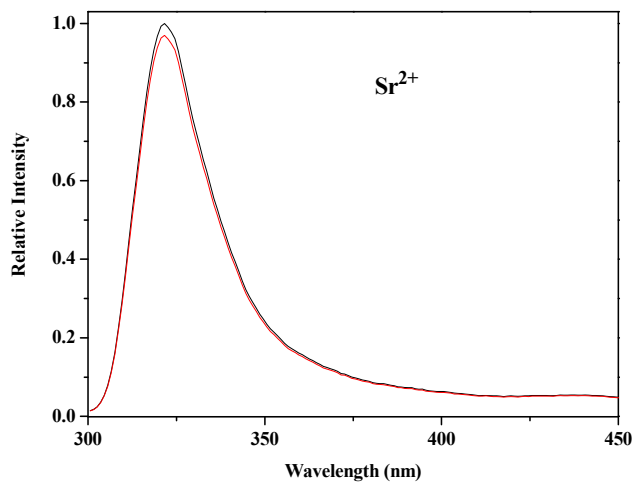

**Figure S2.** The Stern–Volmer plot of Cd-MDIP quenched by  $\text{Fe}^{3+}$  aqueous solution, where  $I_0$  and  $I$  are the fluorescence intensity ratio before and after metal ion incorporation, respectively.

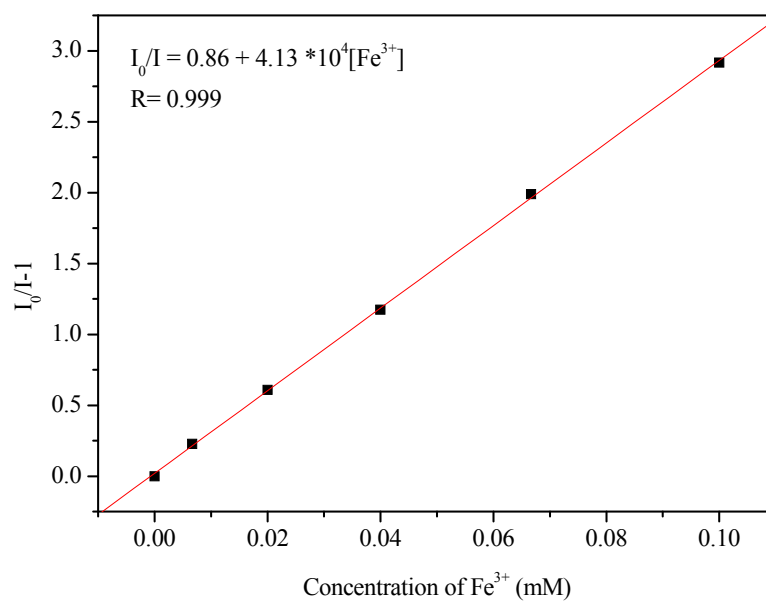

**Figure S3.** The DR UV–vis spectra of Cd-MDIP,  $\text{Fe}(\text{NO}_3)_3$  and Cd-MDIP $\supset\text{Fe}^{3+}$ .

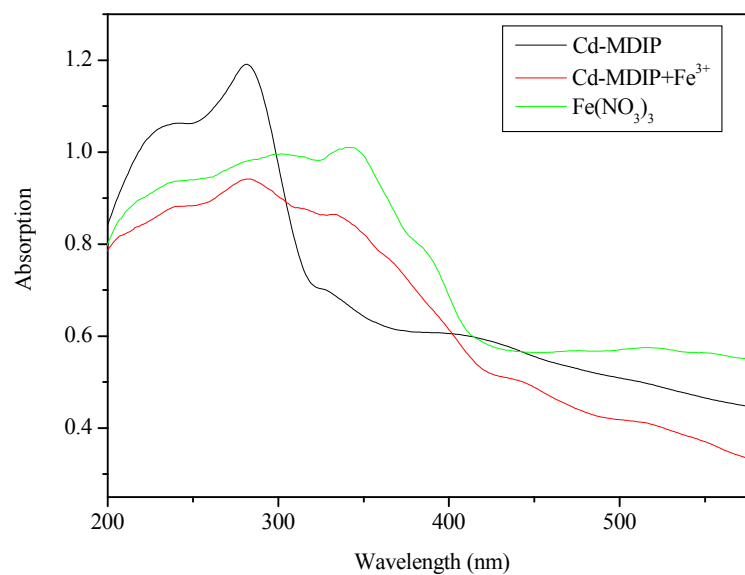



**Table S1.** The ICP results of splitting Cd–MDIP (2 mg), splitting of Cd–MDIP (2 mg) after treated with excess Fe<sup>3+</sup> in 50 mL solution, respectively.

|                                                       | [Cd <sup>2+</sup> ] (μM) | [Fe <sup>3+</sup> ] (μM) |
|-------------------------------------------------------|--------------------------|--------------------------|
| splitting Cd–MDIP                                     | 76.7                     |                          |
| splitting Cd–MDIP after treated with Fe <sup>3+</sup> | 76.5                     | 4.5                      |

**Figure S4.** The PXRD pattern of the residue left of Cd-MDIP and Cd-MDIP→Fe<sup>3+</sup> behind were found to be predominantly CdO phase and CdO + Fe<sub>3</sub>O<sub>4</sub> mixture phase, respectively.

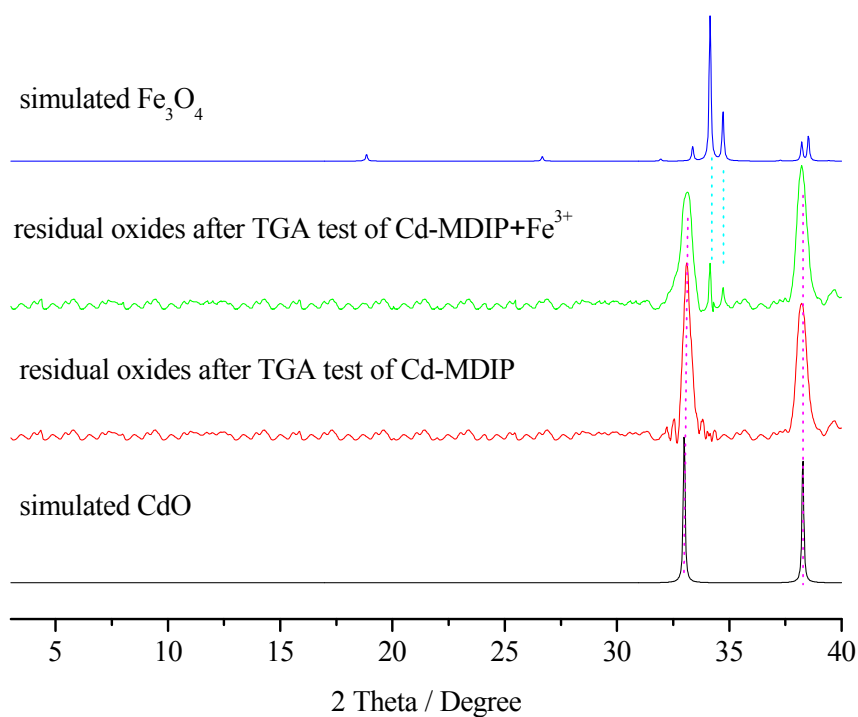

**Figure S5.** Study on recycling of catalyst Cd-MDIP $\Rightarrow$ Fe $^{3+}$  for the heterogeneous cyanosilylation: (CH $_3$ ) $_3$ SiCN: 1.2 mmol; benzaldehyde: 0.5 mmol; Cd-MDIP $\Rightarrow$ Fe $^{3+}$  catalysts: 2.5  $\mu$ mol, room temperature for 2 hours.

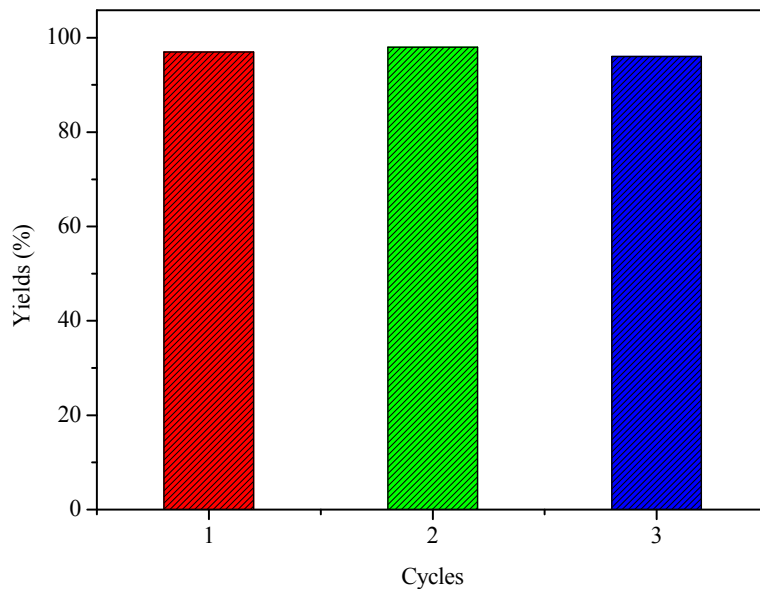

**Figure 6.**  $^1$ H NMR (400 MHz, CDCl $_3$ ) of 2-phenyl-2-(trimethylsilyloxy)-acetonitrile.

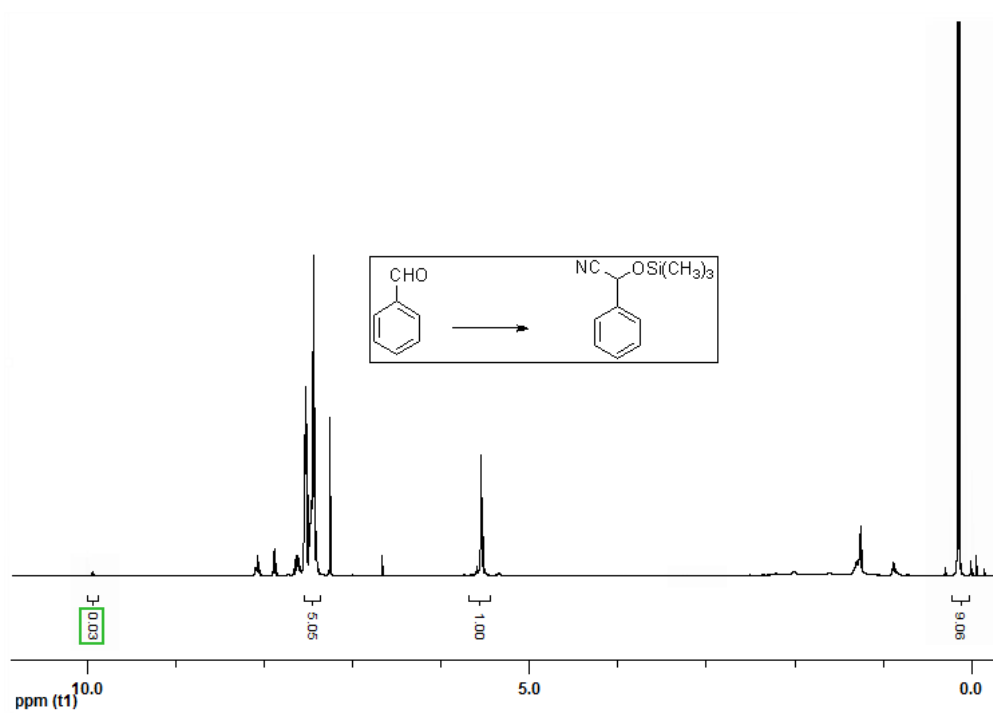

**Figure S7.**  $^1\text{H}$  NMR (400 MHz,  $\text{CDCl}_3$ ) of 2-(4-nitrophenyl)-2-((trimethylsilyloxy)-acetonitrile.

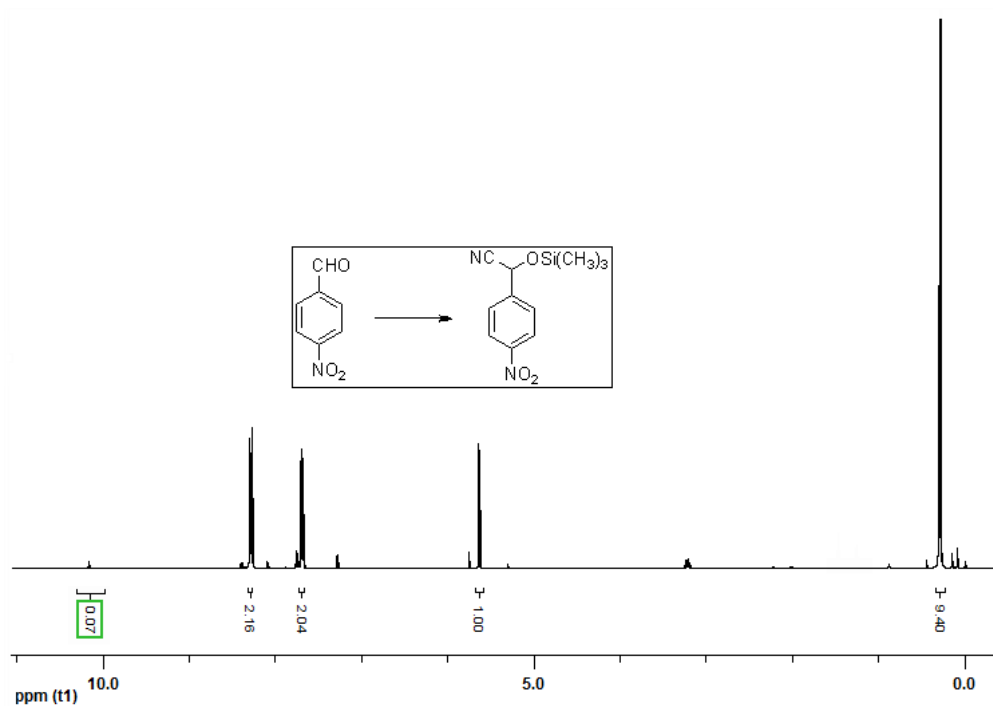

**Figure S8.**  $^1\text{H}$  NMR (400 MHz,  $\text{CDCl}_3$ ) of 2-(4-methoxyphenyl)-2-(trimethylsilyloxy)-acetonitrile.

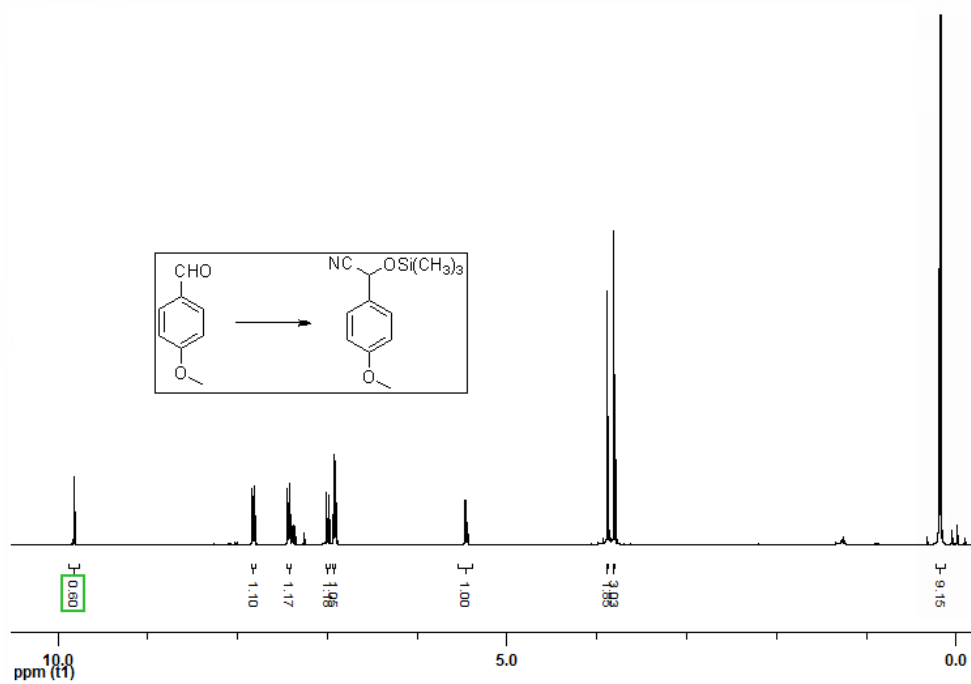

**Figure S9.**  $^1\text{H}$  NMR (400 MHz,  $\text{CDCl}_3$ ) of 2-(naphthalene-1-yl)-2-(trimethylsilyloxy)-acetonitrile.

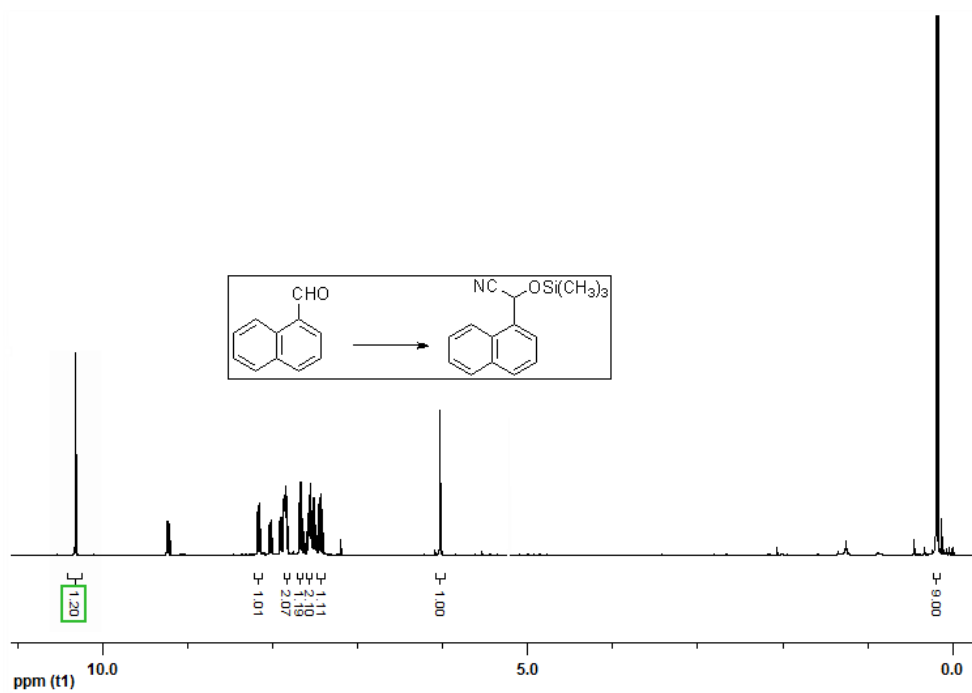

**Table S2.** Comparison with different MOF catalysts in the catalytic of cyanosilylation reaction of benzaldehyde with  $(\text{CH}_3)_3\text{SiCN}$ .

| Entry | Catalyst                           | T (°C) | t (hr) | Yield(%) | Ref.      |
|-------|------------------------------------|--------|--------|----------|-----------|
| 1     | 1·Cd                               | r.t.   | 18     | 94       | [S1]      |
| 2     | Cd-PBA                             | r.t.   | 8      | 99       | [S2]      |
| 3     | Ce-MDIP1                           | r.t.   | 24     | 93       | [S3]      |
| 4     | Ce-MDIP2                           | r.t.   | 24     | 94       | [S3]      |
| 5     | Eu-PDC                             | r.t.   | 3      | 93       | [S4]      |
| 6     | MIL-47 (V)                         | r.t.   | 3      | 46       | [S5]      |
| 7     | MIL-53 (Al)                        | r.t.   | 3      | 26       | [S5]      |
| 8     | MIL-101 (Cr)                       | r.t.   | 4      | 96       | [S5]      |
| 9     | Zn-MOF                             | r.t.   | 10     | 74       | [S6]      |
| 10    | Ce-MOF                             | r.t.   | 2      | 94       | [S7]      |
| 11    | Ps-CMOF                            | r.t.   | 48     | 93       | [S8]      |
| 12    | POMOF-1                            | r.t.   | 24     | 98       | [S9]      |
| 13    | UPC-15                             | r.t.   | 24     | 99       | [S10]     |
| 14    | UPC-16                             | r.t.   | 24     | 97       | [S10]     |
| 15    | Co-MOF                             | r.t.   | 12     | 98       | [S11]     |
| 16    | Cd-bpdc                            | r.t.   | 14     | 95       | [S12]     |
| 17    | Mn-MOF                             | r.t.   | 9      | 98       | [S13]     |
| 18    | Cd-MDIP $\supset$ Fe <sup>3+</sup> | r.t.   | 2      | 97       | This work |

## Reference

- S1. W. Jiang, J. Yang, Y.-Y. Liu, S.-Y. Song, J.-F. Ma, *Inorg. Chem.*, 2017, **56**, 3036.
- S2. L. Hu, G.-X. Hao, H.-D. Luo, C.-X. Ke, G. Shi, J. Lin, X.-M. Lin, U. Y. Qazi, Y.-P. Cai, *Cryst. Growth Des.*, 2018, DOI: 10.1021/acs.cgd.7b01728.
- S3. D. Dang, P. Wu, C. He, Z. Xie, C. Duan, *J. Am. Chem. Soc.*, 2010, **132**, 14321.
- S4. X.-M. Lin, J.-L. Niu, P.-X. Wen, Y. Pang, L. Hu, Y.-P. Cai, *Cryst. Growth Des.*, 2016, **16**, 4705.
- S5. Z. Zhang, J. Chen, Z. Bao, G. Chang, H. Xing, Q. Ren, *RSC Adv.*, 2015, **5**, 79355.
- S6. A. Karmakar, A. Paul, G. M. D. M. Rúbio, M. F. C. G. da Silva, A. J. L. Pombeiro, *Eur. J. Inorg. Chem.*, 2016, **2016**, 5557.
- S7. A. Karmakar, G. M. D. M. Rubio, A. Paul, M. F. C. G. da Silva, K. T. Mahmudov, F. I. Guseinov, S. A. C. Carabineiro, A. J. L. Pombeiro, *Dalton Trans.*, 2017, **46**, 8649.
- S8. J. Li, Y. Ren, C. Qi, H. Jiang, *Chem. Commun.*, 2017, **53**, 8223.
- S9. Q. Han, X. Sun, J. Li, P. Ma, J. Niu, *Inorg. Chem.*, 2014, **53**, 6107.
- S10. X. Wang, L. Zhang, J. Yang, F. Dai, R. Wang, D. Sun, *Chem. Asian J.*, 2015, **10**, 1535.
- S11. X. Cui, M.-C. Xu, L.-J. Zhang, R.-X. Yao, X.-M. Zhang, *Dalton Trans.*, 2015, **44**, 12711.
- S12. A. Bhunia, S. Dey, J. M. Moreno, U. Diaz, P. Concepcion, K. Van Hecke, C. Janiak, P. Van Der Voort, *Chem. Commun.*, 2016, **52**, 1401.
- S13. S. Horike, M. Dincă, K. Tamaki, J. R. Long, *J. Am. Chem. Soc.*, 2008, **130**, 5854.
